# Supplementary material
Source: publisher figshare collection journal article supplement (https://tandf.figshare.com/ndownloader/files/12997073)
Supplement: Supplementary file 1 [file 12997073]

**Table SΙ.** Molecular descriptors for individual compounds

| No. | Gas | *MW*  (g/mol) | *DM*  (D) | *εHOMO*  (a.u.) | *εLUMO*  (a.u.) | *μ*  (a.u.) | *η*  (a.u.) | *w*  (a.u.) | *ZPC*  (Hartree/Particle) |
| --- | --- | --- | --- | --- | --- | --- | --- | --- | --- |
| a | Methane | 16.043 | 0 | -0.38906 | 0.11792 | -0.13557 | 0.50698 | 0.018126183 | 0.045225 |
| b | Propane | 44.097 | 0.0554 | -0.32445 | 0.09607 | -0.11419 | 0.42052 | 0.015503848 | 0.104125 |
| c | Ethylene | 28.054 | 0 | -0.26664 | 0.0188 | -0.12392 | 0.28544 | 0.026899114 | 0.051231 |
| d | Propylene | 42.081 | 0.3557 | -0.24978 | 0.02835 | -0.110715 | 0.27813 | 0.022036118 | 0.080105 |
| e | Methyl ether | 46.069 | 1.2728 | -0.2518 | 0.09242 | -0.07969 | 0.34422 | 0.009224473 | 0.08032 |
| f | Methyl formate | 60.052 | 1.8384 | -0.28368 | 0.00541 | -0.139135 | 0.28909 | 0.033481871 | 0.062493 |
| g | 1,1-Difluoroethane | 66.051 | 1.9529 | -0.32985 | 0.10586 | -0.111995 | 0.43571 | 0.01439361 | 0.061085 |
| h | Ammonia | 17.031 | 1.9124 | -0.25242 | 0.07859 | -0.086915 | 0.33101 | 0.01141086 | 0.034533 |
| i | Carbon monoxide | 28.01 | 1.5567 | -0.43002 | -0.21681 | -0.323415 | 0.21321 | 0.245291643 | 0.013082 |

**Table SII.** Values of molecular descriptors for fuel mixtures

| No. | Mixture | Ratio | *MW*  (g/mol) | *DM*  (D) | *εHOMO*  (a.u.) | *εLUMO*  (a.u.) | *μ*  (a.u.) | *η*  (a.u.) | *w*  (a.u.) | *ZPC*  (Hartree/Particle) |
| --- | --- | --- | --- | --- | --- | --- | --- | --- | --- | --- |
| 1 | a+b | 0.5:0.5 | 30.07 | 0.0277 | -0.356755 | 0.106995 | -0.12488 | 0.46375 | 0.016815016 | 0.074675 |
| 2 | a+b | 0.75:0.25 | 23.0565 | 0.01385 | -0.3729075 | 0.1124575 | -0.130225 | 0.485365 | 0.017470599 | 0.05995 |
| 3 | a+c | 0.5:0.5 | 22.0485 | 0 | -0.32785 | 0.06836 | -0.129745 | 0.39621 | 0.022512649 | 0.048228 |
| 4 | a+c | 0.25:0.75 | 25.05125 | 0 | -0.297245 | 0.04358 | -0.1268325 | 0.340825 | 0.024705882 | 0.0497295 |
| 5 | a+d | 0.5:0.5 | 29.062 | 0.17785 | -0.31942 | 0.073135 | -0.1231425 | 0.392555 | 0.020081151 | 0.062665 |
| 6 | a+d | 0.75:0.25 | 22.5525 | 0.088925 | -0.35424 | 0.0955275 | -0.12935625 | 0.4497675 | 0.019103668 | 0.053945 |
| 7 | a+e | 0.5:0.5 | 31.056 | 0.6364 | -0.32043 | 0.10517 | -0.10763 | 0.4256 | 0.013675328 | 0.0627725 |
| 8 | a+e | 0.25:0.75 | 38.5625 | 0.9546 | -0.286115 | 0.098795 | -0.09366 | 0.38491 | 0.011449901 | 0.07154625 |
| 9 | a+f | 0.5:0.5 | 38.0475 | 0.9192 | -0.33637 | 0.061665 | -0.1373525 | 0.398035 | 0.025804028 | 0.053859 |
| 10 | a+f | 0.75:0.25 | 27.04525 | 0.4596 | -0.362715 | 0.0897925 | -0.13646125 | 0.4525075 | 0.021965106 | 0.049542 |
| 11 | a+g | 0.5:0.5 | 41.047 | 0.97645 | -0.359455 | 0.11189 | -0.1237825 | 0.471345 | 0.016259897 | 0.053155 |
| 12 | a+g | 0.25:0.75 | 53.549 | 1.464675 | -0.3446525 | 0.108875 | -0.11788875 | 0.4535275 | 0.015326754 | 0.05712 |
| 13 | a+h | 0.5:0.5 | 16.537 | 0.9562 | -0.32074 | 0.098255 | -0.1112425 | 0.418995 | 0.014768522 | 0.039879 |
| 14 | a+h | 0.75:0.25 | 16.29 | 0.4781 | -0.3549 | 0.1080875 | -0.12340625 | 0.4629875 | 0.016447353 | 0.042552 |
| 15 | a+i | 0.5:0.5 | 22.0265 | 0.77835 | -0.40954 | -0.049445 | -0.2294925 | 0.360095 | 0.131708913 | 0.0291535 |
| 16 | a+i | 0.25:0.75 | 25.01825 | 1.167525 | -0.41978 | -0.1331275 | -0.27645375 | 0.2866525 | 0.188500278 | 0.02111775 |
| 17 | b+c | 0.5:0.5 | 36.0755 | 0.0277 | -0.295545 | 0.057435 | -0.119055 | 0.35298 | 0.021201481 | 0.077678 |
| 18 | b+c | 0.75:0.25 | 40.08625 | 0.04155 | -0.3099975 | 0.0767525 | -0.1166225 | 0.38675 | 0.018352665 | 0.0909015 |
| 19 | b+d | 0.5:0.5 | 43.089 | 0.20555 | -0.287115 | 0.06221 | -0.1124525 | 0.349325 | 0.018769983 | 0.092115 |
| 20 | b+d | 0.25:0.75 | 42.585 | 0.280625 | -0.2684475 | 0.04528 | -0.11158375 | 0.3137275 | 0.020403051 | 0.08611 |
| 21 | b+e | 0.5:0.5 | 45.083 | 0.6641 | -0.288125 | 0.094245 | -0.09694 | 0.38237 | 0.01236416 | 0.0922225 |
| 22 | b+e | 0.75:0.25 | 44.59 | 0.35975 | -0.3062875 | 0.0951575 | -0.105565 | 0.401445 | 0.013934004 | 0.09817375 |
| 23 | b+f | 0.5:0.5 | 52.0745 | 0.9469 | -0.304065 | 0.05074 | -0.1266625 | 0.354805 | 0.02449286 | 0.083309 |
| 24 | b+f | 0.25:0.75 | 56.06325 | 1.39265 | -0.2938725 | 0.028075 | -0.13289875 | 0.3219475 | 0.028987365 | 0.072901 |
| 25 | b+g | 0.5:0.5 | 55.074 | 1.00415 | -0.32715 | 0.100965 | -0.1130925 | 0.428115 | 0.014948729 | 0.082605 |
| 26 | b+g | 0.75:0.25 | 49.5855 | 0.529775 | -0.3258 | 0.0985175 | -0.11364125 | 0.4243175 | 0.015226289 | 0.093365 |
| 27 | b+h | 0.5:0.5 | 30.564 | 0.9839 | -0.288435 | 0.08733 | -0.1005525 | 0.375765 | 0.013457354 | 0.069329 |
| 28 | b+h | 0.25:0.75 | 23.7975 | 1.44815 | -0.2704275 | 0.08296 | -0.09373375 | 0.3533875 | 0.012434107 | 0.051931 |
| 29 | b+i | 0.5:0.5 | 36.0535 | 0.80605 | -0.377235 | -0.06037 | -0.2188025 | 0.316865 | 0.130397745 | 0.0586035 |
| 30 | b+i | 0.75:0.25 | 40.07525 | 0.430725 | -0.3508425 | 0.01785 | -0.16649625 | 0.3686925 | 0.072950797 | 0.08136425 |
| 31 | c+d | 0.5:0.5 | 35.0675 | 0.17785 | -0.25821 | 0.023575 | -0.1173175 | 0.281785 | 0.024467616 | 0.065668 |
| 32 | c+d | 0.75:0.25 | 31.56075 | 0.088925 | -0.262425 | 0.0211875 | -0.12061875 | 0.2836125 | 0.025683366 | 0.0584495 |
| 33 | c+g | 0.5:0.5 | 47.0525 | 0.97645 | -0.298245 | 0.06233 | -0.1179575 | 0.360575 | 0.020646362 | 0.056158 |
| 34 | c+g | 0.25:0.75 | 56.55175 | 1.464675 | -0.3140475 | 0.084095 | -0.11497625 | 0.3981425 | 0.017519987 | 0.0586215 |
| 35 | c+h | 0.5:0.5 | 22.5425 | 0.9562 | -0.25953 | 0.048695 | -0.1054175 | 0.308225 | 0.019154987 | 0.042882 |
| 36 | c+h | 0.75:0.25 | 25.29825 | 0.4781 | -0.263085 | 0.0337475 | -0.11466875 | 0.2968325 | 0.023027051 | 0.0470565 |
| 37 | c+i | 0.5:0.5 | 28.032 | 0.77835 | -0.34833 | -0.099005 | -0.2236675 | 0.249325 | 0.136095378 | 0.0321565 |
| 38 | c+i | 0.25:0.75 | 28.021 | 1.167525 | -0.389175 | -0.1579075 | -0.27354125 | 0.2312675 | 0.190693511 | 0.02261925 |
| 39 | d+e | 0.5:0.5 | 44.075 | 0.81425 | -0.25079 | 0.060385 | -0.0952025 | 0.311175 | 0.015630295 | 0.0802125 |
| 40 | d+e | 0.75:0.25 | 43.078 | 0.584975 | -0.250285 | 0.0443675 | -0.10295875 | 0.2946525 | 0.018833207 | 0.08015875 |
| 41 | d+f | 0.5:0.5 | 51.0665 | 1.09705 | -0.26673 | 0.01688 | -0.124925 | 0.28361 | 0.027758995 | 0.071299 |
| 42 | d+f | 0.25:0.75 | 55.55925 | 1.467725 | -0.275205 | 0.011145 | -0.13203 | 0.28635 | 0.030620433 | 0.066896 |
| 43 | d+g | 0.5:0.5 | 54.066 | 1.1543 | -0.289815 | 0.067105 | -0.111355 | 0.35692 | 0.018214864 | 0.070595 |
| 44 | d+g | 0.75:0.25 | 48.0735 | 0.755 | -0.2697975 | 0.0477275 | -0.111035 | 0.317525 | 0.020125492 | 0.07535 |
| 45 | e+f | 0.5:0.5 | 53.0605 | 1.5556 | -0.26774 | 0.048915 | -0.1094125 | 0.316655 | 0.021353172 | 0.0714065 |
| 46 | e+f | 0.75:0.25 | 49.56475 | 1.4142 | -0.25977 | 0.0706675 | -0.09455125 | 0.3304375 | 0.015288823 | 0.07586325 |
| 47 | e+g | 0.5:0.5 | 56.06 | 1.61285 | -0.290825 | 0.09914 | -0.0958425 | 0.389965 | 0.011809041 | 0.0707025 |
| 48 | e+g | 0.25:0.75 | 61.0555 | 1.782875 | -0.3103375 | 0.1025 | -0.10391875 | 0.4128375 | 0.013101326 | 0.06589375 |
| 49 | e+h | 0.5:0.5 | 31.55 | 1.5926 | -0.25211 | 0.085505 | -0.0833025 | 0.337615 | 0.010317666 | 0.0574265 |
| 50 | e+h | 0.75:0.25 | 38.8095 | 1.4327 | -0.251955 | 0.0889625 | -0.08149625 | 0.3409175 | 0.00977107 | 0.06887325 |
| 51 | e+i | 0.5:0.5 | 37.0395 | 1.41475 | -0.34091 | -0.062195 | -0.2015525 | 0.278715 | 0.127258057 | 0.046701 |
| 52 | e+i | 0.25:0.75 | 32.52475 | 1.485725 | -0.385465 | -0.1395025 | -0.26248375 | 0.2459625 | 0.18627485 | 0.0298915 |
| 53 | f+g | 0.5:0.5 | 63.0515 | 1.89565 | -0.306765 | 0.055635 | -0.125565 | 0.3624 | 0.023937741 | 0.061789 |
| 54 | f+g | 0.75:0.25 | 61.55175 | 1.867025 | -0.2952225 | 0.0305225 | -0.13235 | 0.325745 | 0.028709806 | 0.062141 |
| 55 | f+h | 0.5:0.5 | 38.5415 | 1.8754 | -0.26805 | 0.042 | -0.113025 | 0.31005 | 0.022446366 | 0.048513 |
| 56 | f+h | 0.25:0.75 | 27.78625 | 1.8939 | -0.260235 | 0.060295 | -0.09997 | 0.32053 | 0.016928613 | 0.041523 |
| 57 | f+i | 0.5:0.5 | 44.031 | 1.69755 | -0.35685 | -0.1057 | -0.231275 | 0.25115 | 0.139386757 | 0.0377875 |
| 58 | f+i | 0.75:0.25 | 52.0415 | 1.767975 | -0.320265 | -0.050145 | -0.185205 | 0.27012 | 0.086434314 | 0.05014025 |
| 59 | g+h | 0.5:0.5 | 41.541 | 1.93265 | -0.291135 | 0.092225 | -0.099455 | 0.38336 | 0.012902235 | 0.047809 |
| 60 | g+h | 0.75:0.25 | 53.796 | 1.942775 | -0.3104925 | 0.0990425 | -0.105725 | 0.409535 | 0.013647923 | 0.054447 |
| 61 | g+i | 0.5:0.5 | 47.0305 | 1.7548 | -0.379935 | -0.055475 | -0.217705 | 0.32446 | 0.129842626 | 0.0370835 |
| 62 | g+i | 0.25:0.75 | 37.52025 | 1.65575 | -0.4049775 | -0.1361425 | -0.27056 | 0.268835 | 0.187567135 | 0.02508275 |
| 63 | h+i | 0.5:0.5 | 22.5205 | 1.73455 | -0.34122 | -0.06911 | -0.205165 | 0.27211 | 0.128351251 | 0.0238075 |
| 64 | h+i | 0.75:0.25 | 19.77575 | 1.823475 | -0.29682 | 0.00474 | -0.14604 | 0.30156 | 0.069881056 | 0.02917025 |
| 65 | a+b+d | 0.33:0.33:0.33 | 34.039593 | 0.1368963 | -0.32077557 | 0.08069922 | -0.120038175 | 0.40147479 | 0.018536827 | 0.076408515 |
| 66 | a+b+f | 0.33:0.33:0.33 | 40.023936 | 0.6306354 | -0.33206427 | 0.0730602 | -0.129502035 | 0.40512447 | 0.022348263 | 0.070543719 |
| 67 | a+b+g | 0.33:0.33:0.33 | 42.021603 | 0.6687639 | -0.34743888 | 0.10651005 | -0.120464415 | 0.45394893 | 0.015991872 | 0.070074855 |
| 68 | a+d+f | 0.33:0.33:0.33 | 39.352608 | 0.7306353 | -0.30719916 | 0.05050944 | -0.12834486 | 0.3577086 | 0.024523509 | 0.062545059 |
| 69 | a+d+g | 0.33:0.33:0.33 | 41.350275 | 0.7687638 | -0.32257377 | 0.08395929 | -0.11930724 | 0.40653306 | 0.018167118 | 0.062076195 |
| 70 | a+f+g | 0.33:0.33:0.33 | 47.334618 | 1.2625029 | -0.33386247 | 0.07632027 | -0.1287711 | 0.41018274 | 0.021978554 | 0.056211399 |
| 71 | b+d+f | 0.33:0.33:0.33 | 48.69459 | 0.7490835 | -0.28568403 | 0.04323339 | -0.12122532 | 0.32891742 | 0.023650271 | 0.082158759 |
| 72 | b+d+g | 0.33:0.33:0.33 | 50.692257 | 0.787212 | -0.30105864 | 0.07668324 | -0.1121877 | 0.37774188 | 0.01729388 | 0.081689895 |
| 73 | b+f+g | 0.33:0.33:0.33 | 56.6766 | 1.2809511 | -0.31234734 | 0.06904422 | -0.12165156 | 0.38139156 | 0.021105316 | 0.075825099 |
| 74 | d+f+g | 0.33:0.33:0.33 | 56.005272 | 1.380951 | -0.28748223 | 0.04649346 | -0.120494385 | 0.33397569 | 0.023280562 | 0.067826439 |
| 75 | b+c+e | 0.33:0.33:0.33 | 39.36726 | 0.4422906 | -0.28068237 | 0.06902757 | -0.1058274 | 0.34970994 | 0.017191935 | 0.078480108 |
| 76 | b+c+i | 0.33:0.33:0.33 | 33.353613 | 0.5368293 | -0.34002963 | -0.03394602 | -0.186987825 | 0.30608361 | 0.095802303 | 0.056089854 |
| 77 | b+e+i | 0.33:0.33:0.33 | 39.352608 | 0.9606717 | -0.33508791 | -0.00943056 | -0.172259235 | 0.32565735 | 0.089916647 | 0.065776491 |
| 78 | c+e+i | 0.33:0.33:0.33 | 34.010289 | 0.9422235 | -0.31583718 | -0.03516147 | -0.175499325 | 0.28067571 | 0.093711271 | 0.048162789 |

**Table SIII.** Observed and predicted UFL values

| No. | Mixture | Obs. (vol%) | Points out | | Mixtures out | | Compounds out | |
| --- | --- | --- | --- | --- | --- | --- | --- | --- |
| Status | Pre. (vol%) | Status | Pre. (vol%) | Status | Pre. (vol%) |
| 1 | a+b | 12.1 | Test | 14.49 | Training | 14.71 | Training | 13.51 |
| 2 | a+b | 13.5 | Training | 16.25 | Training | 16.59 | Training | 15.79 |
| 3 | a+c | 20.5 | Test | 19.57 | Training | 19.54 | Training | 20.09 |
| 4 | a+c | 25 | Training | 21.14 | Training | 21.81 | Training | 21.83 |
| 5 | a+d | 12.6 | Training | 15.77 | Training | 15.77 | Training | 15.79 |
| 6 | a+d | 13.8 | Training | 16.98 | Training | 16.99 | Training | 16.98 |
| 7 | a+e | 17.5 | Training | 15.95 | Training | 15.93 | Test | 15.34 |
| 8 | a+e | 20.1 | Training | 15.99 | Training | 15.91 | Test | 14.87 |
| 9 | a+f | 18.3 | Training | 17.85 | Training | 17.31 | Training | 18.10 |
| 10 | a+f | 16.6 | Training | 17.42 | Training | 17.23 | Training | 17.56 |
| 11 | a+g | 16 | Training | 17.80 | Training | 18.00 | Training | 17.18 |
| 12 | a+g | 16.6 | Training | 19.07 | Training | 19.30 | Training | 17.95 |
| 13 | a+h | 19.8 | Training | 21.24 | Test | 20.99 | Training | 21.71 |
| 14 | a+h | 17.3 | Training | 19.06 | Test | 19.05 | Training | 19.25 |
| 15 | a+i | 25 | Training | 27.46 | Training | 26.96 | Training | 27.87 |
| 16 | a+i | 36.1 | Test | 37.10 | Training | 36.94 | Training | 37.04 |
| 17 | b+c | 14.7 | Training | 13.80 | Training | 14.22 | Training | 13.36 |
| 18 | b+c | 11.25 | Training | 12.67 | Training | 12.59 | Training | 11.38 |
| 19 | b+d | 10.5 | Training | 12.36 | Training | 12.36 | Training | 11.15 |
| 20 | b+d | 10.5 | Test | 13.13 | Training | 13.69 | Training | 12.42 |
| 21 | b+e | 13.2 | Training | 13.59 | Training | 13.20 | Test | 11.50 |
| 22 | b+e | 10.9 | Test | 13.26 | Training | 12.85 | Test | 11.13 |
| 23 | b+f | 13.8 | Training | 13.50 | Training | 13.01 | Training | 12.30 |
| 24 | b+f | 16.8 | Training | 17.67 | Training | 17.45 | Training | 16.96 |
| 25 | b+g | 12.4 | Test | 14.93 | Training | 14.82 | Training | 12.85 |
| 26 | b+g | 11 | Training | 13.46 | Training | 13.13 | Training | 11.29 |
| 27 | b+h | 14.5 | Training | 16.24 | Training | 16.09 | Training | 15.42 |
| 28 | b+h | 18.8 | Training | 21.98 | Training | 21.98 | Training | 21.98 |
| 29 | b+i | 16.8 | Training | 19.98 | Training | 19.98 | Training | 19.98 |
| 30 | b+i | 12.1 | Training | 10.65 | Training | 10.25 | Training | 10.19 |
| 31 | c+d | 14.6 | Training | 18.24 | Test | 20.08 | Training | 18.63 |
| 32 | c+d | 19.5 | Test | 20.43 | Test | 22.38 | Training | 21.02 |
| 33 | c+g | 20.5 | Training | 18.86 | Training | 18.63 | Training | 19.20 |
| 34 | c+g | 18 | Training | 19.25 | Training | 19.04 | Training | 18.51 |
| 35 | c+h | 27.2 | Training | 25.19 | Training | 25.73 | Training | 26.53 |
| 36 | c+h | 28.4 | Training | 23.78 | Training | 24.96 | Training | 25.00 |
| 37 | c+i | 37 | Test | 33.36 | Training | 34.74 | Training | 34.41 |
| 38 | c+i | 42.3 | Training | 39.12 | Training | 39.12 | Training | 39.11 |
| 39 | d+e | 15 | Training | 15.19 | Test | 15.40 | Test | 14.37 |
| 40 | d+e | 12.4 | Training | 14.83 | Test | 15.53 | Test | 14.37 |
| 41 | d+f | 14.9 | Training | 18.04 | Test | 18.66 | Training | 18.06 |
| 42 | d+f | 18.1 | Training | 20.66 | Test | 21.04 | Training | 20.52 |
| 43 | d+g | 13.1 | Training | 16.58 | Training | 16.34 | Training | 15.82 |
| 44 | d+g | 12 | Training | 15.19 | Training | 15.42 | Training | 14.84 |
| 45 | e+f | 20.5 | Training | 19.41 | Training | 19.41 | Test | 18.47 |
| 46 | e+f | 21.2 | Training | 18.01 | Training | 18.01 | Test | 16.73 |
| 47 | e+g | 18.5 | Training | 18.96 | Training | 19.14 | Test | 17.30 |
| 48 | e+g | 17.4 | Test | 20.01 | Training | 20.29 | Test | 18.34 |
| 49 | e+h | 22.4 | Test | 21.99 | Training | 22.19 | Test | 21.56 |
| 50 | e+h | 21.3 | Test | 19.28 | Training | 19.45 | Test | 18.25 |
| 51 | e+i | 29 | Training | 28.46 | Training | 29.23 | Test | 29.09 |
| 52 | e+i | 36.7 | Training | 37.60 | Training | 38.10 | Test | 37.93 |
| 53 | f+g | 19.6 | Training | 21.43 | Training | 21.12 | Training | 20.21 |
| 54 | f+g | 20.9 | Training | 22.27 | Training | 22.06 | Training | 21.39 |
| 55 | f+h | 25 | Training | 25.75 | Test | 25.87 | Training | 25.70 |
| 56 | f+h | 26.6 | Test | 26.77 | Test | 26.85 | Training | 26.88 |
| 57 | f+i | 33.3 | Training | 34.44 | Training | 35.99 | Training | 35.57 |
| 58 | f+i | 26.6 | Training | 28.10 | Training | 29.05 | Training | 28.64 |
| 59 | g+h | 20.8 | Training | 23.46 | Test | 23.44 | Training | 22.76 |
| 60 | g+h | 18.9 | Training | 21.99 | Test | 22.12 | Training | 20.79 |
| 61 | g+i | 26.9 | Training | 30.09 | Training | 30.08 | Training | 30.08 |
| 62 | g+i | 37.7 | Training | 37.72 | Training | 38.32 | Training | 38.11 |
| 63 | h+i | 42 | Test | 36.17 | Training | 38.00 | Training | 37.92 |
| 64 | h+i | 34.7 | Training | 31.52 | Training | 32.01 | Training | 32.47 |
| 65 | a+b+d | 11.6 | Training | 13.48 | Training | 13.44 | Training | 12.75 |
| 66 | a+b+f | 14.2 | Test | 13.92 | Training | 13.55 | Training | 13.31 |
| 67 | a+b+g | 13.3 | Training | 14.87 | Training | 14.94 | Training | 13.68 |
| 68 | a+d+f | 14.8 | Training | 16.48 | Test | 16.30 | Training | 16.73 |
| 69 | a+d+g | 13.7 | Test | 16.01 | Training | 15.74 | Training | 15.68 |
| 70 | a+f+g | 17.6 | Training | 18.35 | Training | 17.94 | Training | 17.94 |
| 71 | b+d+f | 12.7 | Training | 13.48 | Test | 13.40 | Training | 12.73 |
| 72 | b+d+g | 12 | Training | 13.61 | Training | 13.23 | Training | 12.26 |
| 73 | b+f+g | 14.7 | Training | 15.88 | Training | 15.48 | Training | 14.47 |
| 74 | d+f+g | 15.3 | Training | 18.45 | Test | 18.25 | Training | 17.89 |
| 75 | b+c+e | 15 | Training | 13.74 | Training | 13.78 | Test | 13.02 |
| 76 | b+c+i | 18.3 | Training | 19.46 | Training | 20.31 | Training | 20.25 |
| 77 | b+e+i | 16.7 | Training | 16.27 | Training | 16.01 | Test | 16.28 |
| 78 | c+e+i | 27.5 | Training | 24.83 | Training | 25.99 | Test | 26.08 |
